# Supplementary figures and images for: Universal Suicide Risk Screening for Youths in the Emergency Department: A Systematic Review
Source: Atypon-hosted journal article supplement (doi:10.1176/appi.ps.202000881), 2021-06-09

Figure 1. PRISMA Flow Diagram

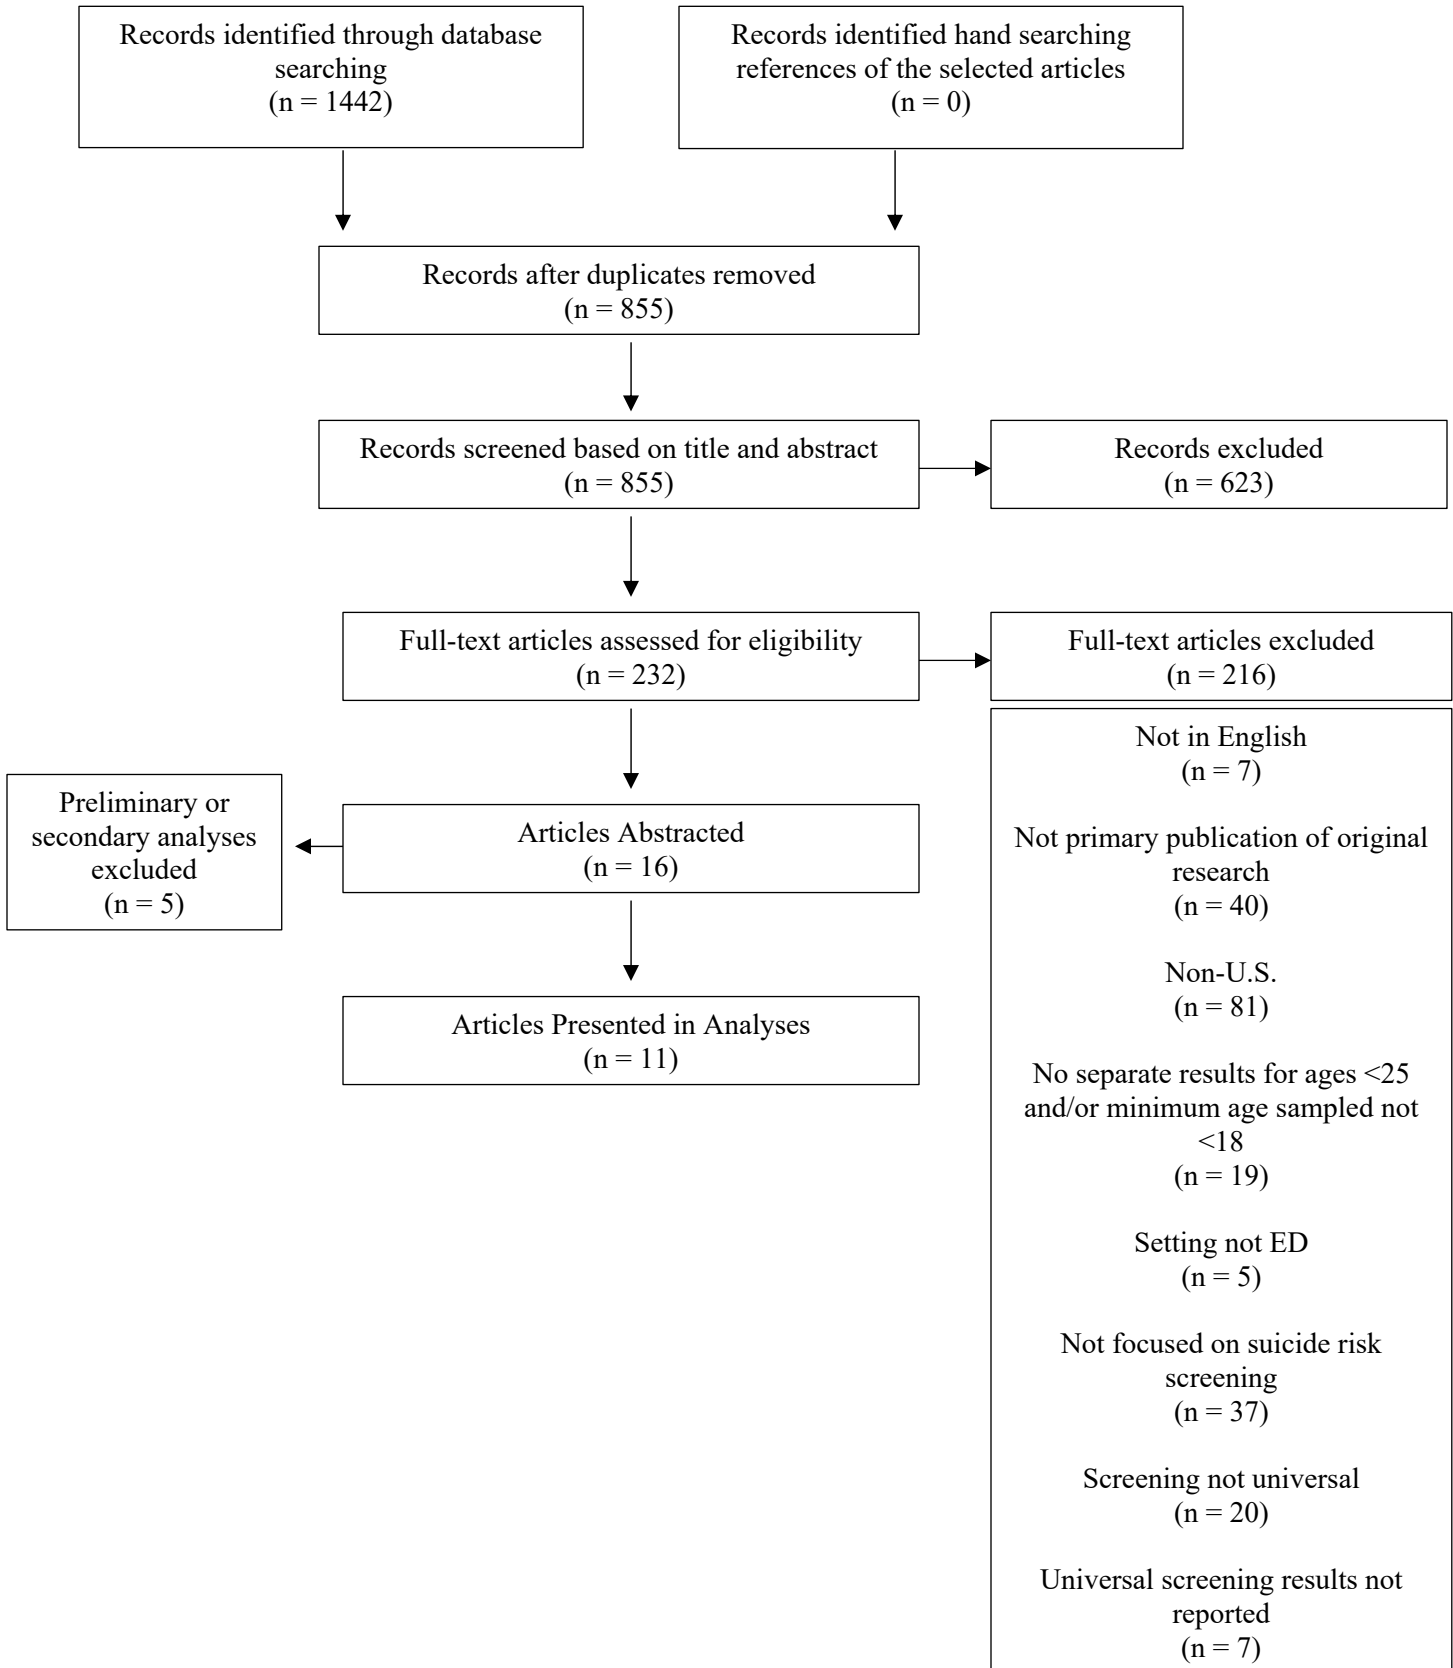

Supplement: appi.ps.202000881.ds001.pdf [file appi.ps.202000881.ds001.pdf]
